# Supplementary material for: Teratogenic Effects of Topiramate in a Zebrafish Model
Source: PubMed Central journal article supplement (PMC5578111; doi:10.3390/ijms18081721), 2017-08-07
Supplement: ijms-18-01721-s001.pdf [file ijms-18-01721-s001.pdf]

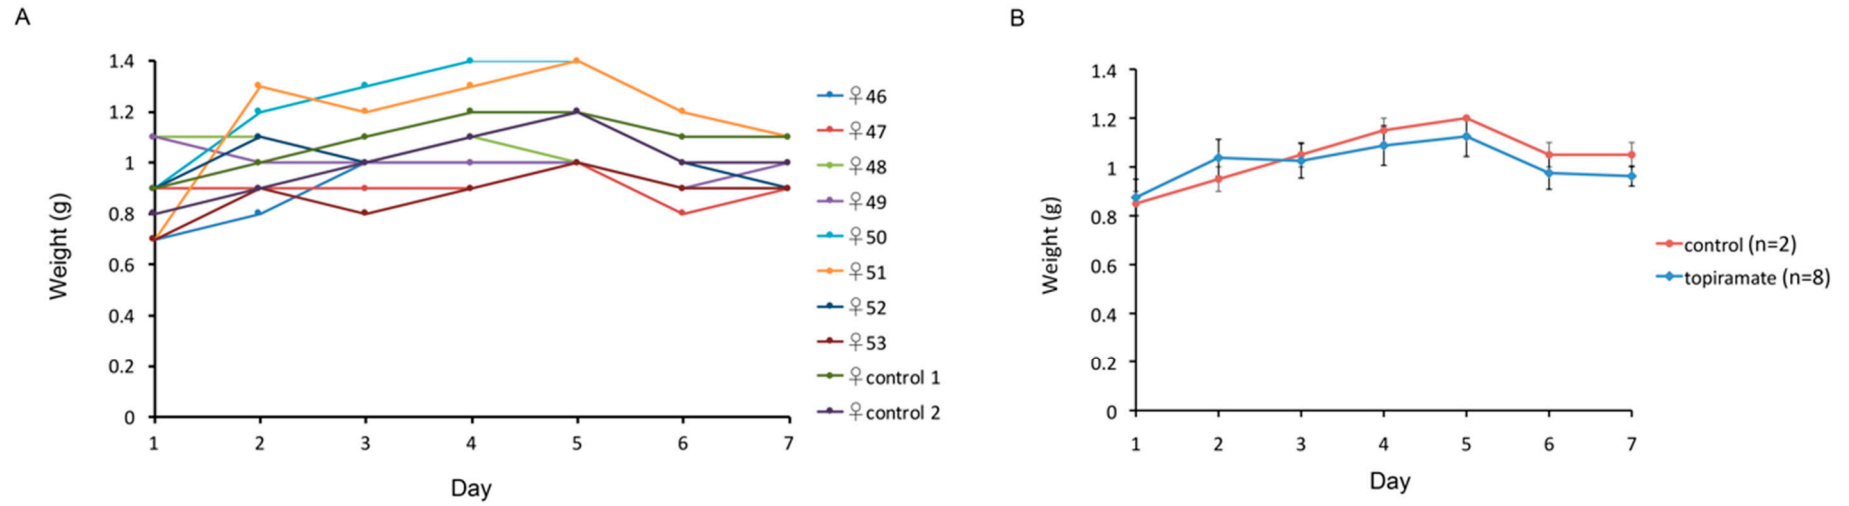

**Figure S1.** Body weight of control and topiramate-treated females. (A) Weight log during feeding period. (B) Statistical analysis of weight change of control and topiramate-treated group.

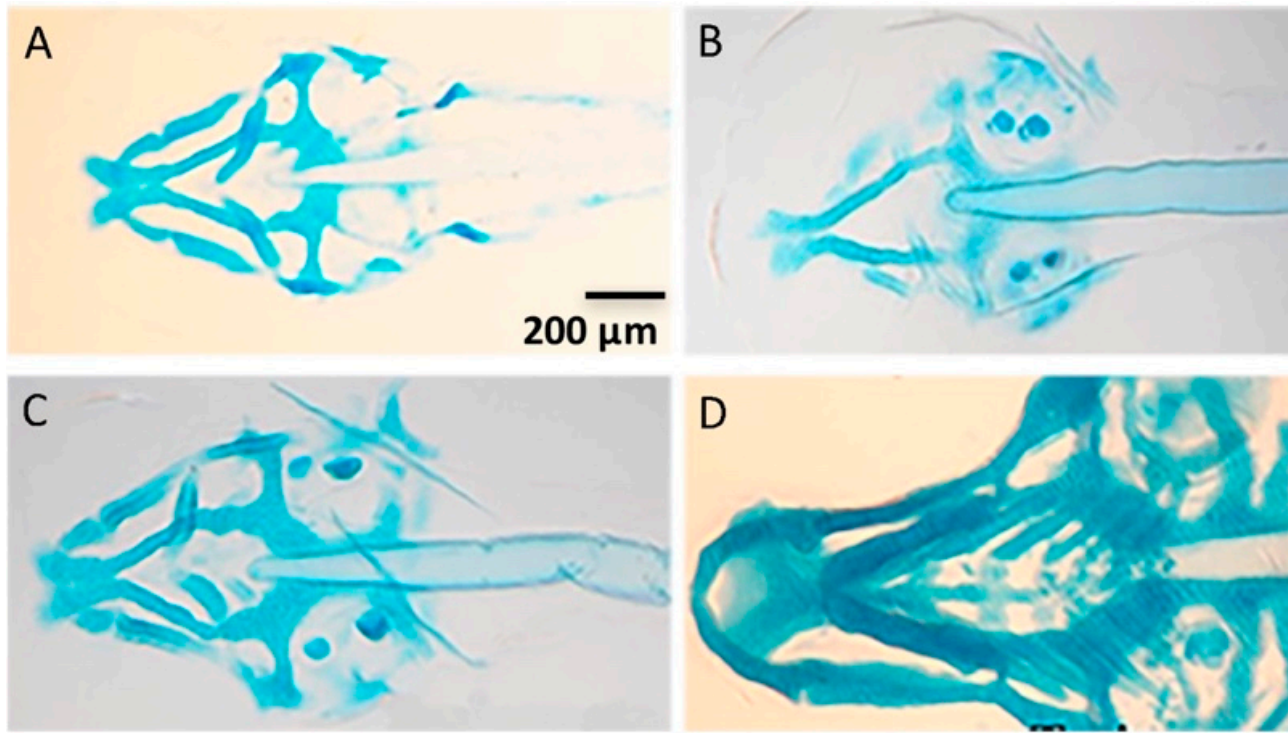

Figure S2. Craniofacial cartilage abnormalities upon diverse topiramate-treated offspring.
